# 1 Expansion microscopy resolves the 3D 2 thylakoid structure

3

4 Peter R. Bos<sup>1</sup>, Jarne Berentsen<sup>1</sup>, Emilie Wientjes<sup>1</sup>.

5

6 <sup>1</sup>Laboratory of Biophysics, Wageningen University & Research, P.O. Box 8128, 6700 ET  
7 Wageningen, The Netherlands

8

9

10

## 11        **Abstract**

12        The light-harvesting reactions of photosynthesis take place on the thylakoid membrane inside  
13 chloroplasts. The thylakoid membrane is folded into appressed membranes, the grana, and non-  
14 appressed membranes that interconnect the grana, the stroma lamellae. This folding is essential for  
15 the correct functioning of photosynthesis. Electron microscopy and atomic force microscopy are  
16 commonly used to study the thylakoid membrane, but these techniques have limitations in  
17 visualizing a complete chloroplast and its organization. To overcome this limitation, we applied  
18 expansion microscopy (ExM) on isolated chloroplasts. ExM is a technique that involves physically  
19 expanding a sample in a swellable hydrogel to enhance the spatial resolution of fluorescence  
20 microscopy. Using all-protein staining, we have visualized the 3D structure of spinach thylakoids with  
21 a high level of detail. We were able to resolve stroma lamellae that were 60 nm apart and observe  
22 their helical wrapping around the grana. Furthermore, we accurately measured the dimensions of  
23 grana from top-views of chloroplasts, which allow for precise determination of the grana diameter.  
24 Ultimately, we constructed a 3D model of a complete chloroplast, which provides a foundation for  
25 structure-based modeling of photosynthetic adaptations. Our results demonstrate that ExM is a fast  
26 and reliable technique for studying thylakoid organization with a high level of detail.

27

28

## 29 Introduction

30 Photosynthesis powers virtually all life on Earth. The initial steps of photosynthesis, light-  
31 harvesting and electron transfer, take place in the thylakoid membrane, a single continuous  
32 membrane located in the chloroplast (Blankenship, 2021). The thylakoid membrane is intricately  
33 folded into non-appressed membranes, called stroma lamellae, and appressed membrane stacks,  
34 called grana. The grana stacks are approximately cylindrical with a diameter of 280-600 nm, but this  
35 diameter is variable in response to different light conditions (Mehta et al., 1999; Kaftan et al., 2002;  
36 Shimoni et al., 2005; Fristedt et al., 2009; Anderson et al., 2012; Armbruster et al., 2013; Pribil et al.,  
37 2014; Schumann et al., 2017; Wood et al., 2018; Bussi et al., 2019; Sattari Vayghan et al., 2022). The  
38 stroma lamellae are wrapped around the grana in a right-handed helix and are connected to the  
39 grana at slit-like apertures (Bussi et al., 2019). The thylakoid membrane has a protein concentration  
40 of 70%, but remains highly dynamic (Kirchhoff, 2014). Moreover, diffusion within the membrane and  
41 between the grana and stroma is fast, on the sub-second timescale for plastocyanin and still on the  
42 minute timescale for protein complexes (Kirchhoff, 2014; Höhner et al., 2020). How the thylakoid,  
43 with its complex 3D architecture can be so dynamic and what factors facilitate it, is not well  
44 understood (Johnson and Wientjes, 2020).

45 The folding and organization of the thylakoid membrane have been extensively studied using  
46 various techniques (Pribil et al., 2014; Blankenship, 2021). Electron microscopy (EM) is the most  
47 commonly used method, with transmission EM (TEM) providing sufficient resolution to image single  
48 membrane bilayers within each granum stack. TEM images have revealed the helical wrapping of  
49 stroma around the grana (Paolillo Jr, 1970; Mustárdy and Garab, 2003; Mustardy et al., 2008). A  
50 further increase in resolution has been achieved using scanning EM and focused ion beam scanning  
51 EM, which showed a left-handed helix in the stroma lamellae as well (Bussi et al., 2019). Lastly, Cryo-  
52 EM has been used to study the thylakoid membrane of *Chlamydomonas reinhardtii* with nanometer  
53 resolution (Engel et al., 2015; Wietrzynski et al., 2020). However, constructing a 3D model of the  
54 entire thylakoid membrane using EM is challenging due to the need for thin sample slices (max 200  
55 nm) and the time-consuming and expensive sample preparation and imaging (Wassie et al., 2019).  
56 Additionally, localizing specific proteins in the thylakoid membrane is difficult, since many of the  
57 proteins hardly protrude from the membrane (Johnson et al., 2014; Wietrzynski et al., 2020). Specific  
58 protein localization is possible with atomic force microscopy, but this technique can image only a  
59 single layer of membrane (Liu and Scheuring, 2013; Wood et al., 2018; Onoa et al., 2020).  
60 Fluorescence microscopy can resolve the position of the grana but lacks the resolution to study the  
61 membrane (Mehta et al., 1999; Wildman et al., 2005). Although Structure Illuminated Microscopy  
62 (SIM) has improved the resolution of fluorescence microscopy, it still lacks the desired molecular

63 detail (Iwai et al., 2018; Wood et al., 2019; Flannery et al., 2021). Other single molecule or super  
64 resolution microscopy techniques have not yet been applied on the thylakoid membrane, mainly due  
65 to difficulties with the massive autofluorescence of chlorophyll in such a complex system (Johnson  
66 and Wientjes, 2020). Thus, while imaging whole chloroplasts with fluorescence microscopy is fast and  
67 easy, the resolution of these techniques is not sufficient to resolve the fine structures of the  
68 thylakoid membrane. Hence, chloroplasts are too large to be easily visualized with EM but too small  
69 to be accurately imaged with fluorescence microscopy.

70 The gap in resolution between EM and fluorescence microscopy has been bridged with the  
71 introduction of expansion microscopy (ExM). In ExM, a sample is physically expanded isotropically in  
72 a swellable hydrogel, resulting in a larger distance between fluorophores and proteins (Chen et al.,  
73 2015; Gambarotto et al., 2019; Damstra et al., 2022). By doing so, the effective resolution of the  
74 sample is improved. Moreover, the sample is de-crowded, which increases diffusion and epitope  
75 recognition by antibodies (Chen et al., 2015). Several methods have been developed to stain lipids,  
76 all proteins, and/or only specific proteins (Damstra et al., 2022).

77 In this work, we developed a method for ExM on de-enveloped chloroplasts. We combined  
78 ultrastructure-ExM (U-ExM), an optimized version of the original protein-retention ExM protocol,  
79 with an all-protein staining (Pan-ExM) (Gambarotto et al., 2019; M'Saad and Bewersdorf, 2020) and  
80 achieved a 4.8-6.7 times expansion of chloroplasts. We measured or quantified the dimensions of the  
81 grana and confirmed the right-handed helical stroma around the grana. Together this shows that  
82 chloroplasts can be imaged easily, fast, and accurately and presents the potential of using ExM in  
83 future studies to reveal the dynamics of the thylakoid membrane.

84

85

## 86           Material and Methods

### 87           **Isolation of de-enveloped chloroplasts**

88           *Spinacia oleracea* (Spinach) was purchased from the local grocer. Chloroplasts were isolated in  
89 the dark according to an adapted protocol from Caffari et al. (Caffarri et al., 2009). In short, leaves  
90 were chilled in ice water. They were then quickly homogenized in a blender in ice cold buffer 1 (B1:  
91 400 mM sorbitol, 5 mM EDTA, 10 mM NaHCO<sub>3</sub>, 5 mM MgCl<sub>2</sub> and 20 mM tricine). The resulting  
92 suspension was filtered through a cheesecloth and the (de-enveloped) chloroplasts were pelleted by  
93 centrifugation (1500 ×g, 5 min, 4 °C). The pellet was carefully resuspended in buffer 1. Centrifugation  
94 and resuspension were repeated twice. Chloroplasts were kept at 4 °C in the dark until further use.

95

### 96           **Chloroplast fixation**

97           The protocol for (de-enveloped) chloroplast fixation was based on the fixation of mitochondria  
98 as described by Gambarotto and co-workers (Gambarotto et al., 2019). For the fixation,  
99 paraformaldehyde (PFA) was warmed to 37 °C for 30 minutes to increase its reactivity. Chloroplasts  
100 were fixed in a 3% PFA, 0.1% glutaraldehyde (GA) solution in B1 for 30 minutes at room temperature.  
101 They were then washed twice in B1 and permeabilized in 0.1% Triton X-100 in B1 for 3 minutes on  
102 ice. After three wash steps, chloroplasts were anchored in a solution of 1.0% acrylamide (AA) and  
103 0.7% PFA overnight at room temperature in the dark. The anchor of AA is essential for covalent  
104 bonding of the proteins to the sodium acrylate (SA) - AA gel. Chloroplasts were washed 4 times to  
105 remove traces of PFA and AA and stored at 4 °C until further use. Chloroplasts retained their  
106 structure for at least two weeks when kept cool and in the dark.

107

### 108           **Gel composition**

109           SA was synthesized according to the protocol from Damstra et al. (Damstra et al., 2022) or  
110 purchased from Sigma-Aldrich. The gel composition was based on the Ultrastructure-ExM protocol  
111 from Gambarotto and co-workers (Gambarotto et al., 2019).

112           Several gel compositions with different expansion factors have been used to test expansion  
113 factor of the gel and expansion factor of the chloroplasts (table 1). All gel compositions contained  
114 1.1× phosphate buffered saline (PBS). Gel composition B has been used for most images in this  
115 article.

116

117

## 118 **Chloroplast expansion**

119 Fixed and anchored chloroplasts were mixed with the gel solution in a 1:10 ratio and kept on  
120 ice. Gel polymerization was started by adding 0.1 w/v% N,N,N',N'-tetramethyl ethylenediamine  
121 (TEMED) and 0.1 w/v% ammonium persulphate (APS) from 10 w/v% stocks, and the solution was  
122 quickly pipetted in a polymerization chamber as described by Zhang et al. (Zhang et al., 2020).  
123 Alternatively, a drop of fixed and anchored chloroplasts was spread on a coverslip and allowed to dry  
124 for 20 minutes. Again, gel polymerisation was started by adding TEMED and APS at 0.1 w/v%. The  
125 solution was quickly pipetted in a polymerization chamber and closed with the coverslip with the  
126 layer of chloroplasts in the gel solution.

127 The gels were allowed to polymerize for 1.5 h in a humid environment at room temperature.  
128 Afterwards, they were removed from the chamber, cut into an asymmetrical shape, photographed  
129 and expanded in a petri dish in ultrapure water. After 3 to 5 washing steps in ultrapure water, full  
130 expansion was achieved and the gel was photographed again. The expansion factor of the gel was  
131 determined dividing the dimensions of the gel after expansion by its dimensions before expansion. A  
132 small piece was cut out and put in an 8-well plate. The gel was washed twice in 0.1 M NaHCO<sub>3</sub>, pH  
133 8.3 and stained in 20 µg/mL N-Hydroxysuccinimide (NHS) ester-ATTO488 (ATTO-TEC GmbH, Art. Nr.:  
134 AD 488) in 0.1 M NaHCO<sub>3</sub>, pH 8.3 for 1.5 h. After staining, the gel was washed several times in  
135 ultrapure water to achieve full expansion and remove any unbound staining.

136

## 137 **Imaging**

138 Unexpanded chloroplasts - A few microliter of fixed chloroplasts were placed on a microscope  
139 slide and covered with a coverslip. The chloroplasts were imaged with a confocal TCS SP8 system  
140 from Leica Microsystems equipped with an HC PL APO CS2 63×/1.20 NA water immersion objective  
141 and a white light laser. Excitation wavelength was set to 620 nm and detection wavelength to  
142 capture chlorophyll fluorescence (670-730 nm). Z-stacks were recorded to image the complete  
143 chloroplasts.

144 ExM imaging - The gels were imaged with one of several microscopes. We used a confocal TCS  
145 SP8 system from Leica Microsystems equipped with a HC PL APO CS2 63×/1.20 NA water immersion  
146 objective and an argon laser. Alternatively, we used a confocal TCS SP8 system from Leica  
147 Microsystems equipped with a HC PL IRAPO 40×/1.10 NA water immersion objective and two-photon  
148 excitation. Lastly, we used the ZEISS Elyra 7 with Lattice SIM<sup>2</sup> with a C-Apochromat 63×/1.2 NA water  
149 immersion objective at the ZEISS demo-center in Oberkochen. Excitation was set to 488 nm (single  
150 photon excitation) or 750 nm (two-photon excitation) and emission to only record ATTO488 signal

151 (505-540 nm). Z-stacks were recorded to image complete chloroplasts. A novel image reconstruction  
152 algorithm from ZEISS was applied on the images from the Elyra 7 with Lattice SIM<sup>2</sup>. All three  
153 microscopes recorded mirror images, so the recorded images were mirrored back before image  
154 analysis.

155

## 156 **Image analysis**

157 Chloroplast dimensions and expansion factor - To estimate the expansion factor, we imaged  
158 chloroplasts before and after expansion. Only top-view images of chloroplasts were used to measure  
159 their size. Unexpanded chloroplasts and expanded chloroplasts were detected in each slice of the Z-  
160 stack and measured by a custom-written FIJI script. This script returned for each detected chloroplast  
161 measures like area, mean intensity and circularity as calculated by  $4\pi \cdot \text{area} / \text{perimeter}^2$ . Only  
162 objects that met set criteria for circularity and area were selected. The shape of a chloroplast was  
163 assumed to be circular and the radius was calculated from the area. Moreover, an ellipse was fitted  
164 around the object and the X and Y coordinates of the center were returned. Based on these  
165 coordinates, chloroplasts that appeared in multiple images of the z-stack were clustered by a  
166 custom-written Python script. The script to detect chloroplasts could make mistakes in a few slices of  
167 the images, for example by grouping neighboring chloroplasts. We set the minimal number of slices  
168 in which a chloroplast needed to be detected to 4, to prevent these outliers from appearing in the  
169 data. The 75<sup>th</sup> percentile was taken as the size of the chloroplasts. This value was on average about  
170 95% of the maximum value. The expansion factor of the chloroplasts was calculated by dividing the  
171 average radius of chloroplasts in a single gel by the average radius of unexpanded and fixed  
172 chloroplasts.

173 Grana dimensions - The grana diameter was determined with custom written scripts in FIJI,  
174 Google Colab and Python. Top-view images of chloroplasts with clear grana were selected and  
175 integrated to have a the same pixel size in pre-expansion dimensions. Grana were detected by a the  
176 Stardist 2D plugin (Schmidt et al., 2018; Weigert et al., 2020; Gómez-de-Mariscal et al., 2021).  
177 Stardist is a machine learning tool to detect convex-star shaped objects. A Stardist model was trained  
178 on an image set of chloroplast images with annotated grana. FIJI was used to measure the ROIs  
179 generated by Stardist in the original image and Python was used to cluster detected grana with  
180 similar X, Y and Z coordinates. The maximum detected size of a clustered grana value set was taken.  
181 The values were divided by the expansion factor as measured from chloroplast expansion to retrieve  
182 the pre-expansion size of the grana.

183 Grana height was measured by hand in FIJI in side-view images from chloroplasts. Values were  
184 divided by the expansion factor as measured from chloroplast expansion to retrieve the pre-  
185 expansion dimensions.

186 The number of grana was counted by hand in FIJI in 20 randomly selected images containing top  
187 views of chloroplasts.

188 Resolution – The minimal distance that could be distinguished with ExM was determined by  
189 making intensity profiles in images with stroma lamellae in close proximity. The full-width half  
190 maximum (FWHM) was determined and its middle was taken as the center of the peak. Distance  
191 between the peaks was calculated in pre-expansion dimensions.

192 All scripts and models are made available on Github ([https://git.wur.nl/peter1.bos/230322-exm-  
193 script-for-chloroplast-and-grana-detection.git](https://git.wur.nl/peter1.bos/230322-exm-script-for-chloroplast-and-grana-detection.git)).

194

### 195 **3D reconstruction**

196 3D reconstruction was performed with Drishti (Limaye, 2012). First, FIJI was used to smooth a  
197 top-view image and integrate it in X, Y and Z to get a voxel size of 60 nm in all directions. Drishti Paint  
198 was then used to segment grana from the rest of the image (Hu et al., 2020). The grana segment was  
199 colored differently than the surroundings and a 3D reconstruction of a chloroplast and its grana was  
200 animated.

201

202





204 The thylakoid structure of chloroplasts from plants has been investigated with various imaging  
205 techniques, such as EM, AFM and confocal microscopy (Pribil et al., 2014; Wietrzynski et al., 2020;  
206 Blankenship, 2021). However, there is a resolution gap among these techniques that can be bridged  
207 using ExM. In this study, we developed a method for ExM on isolated chloroplasts. The chloroplasts

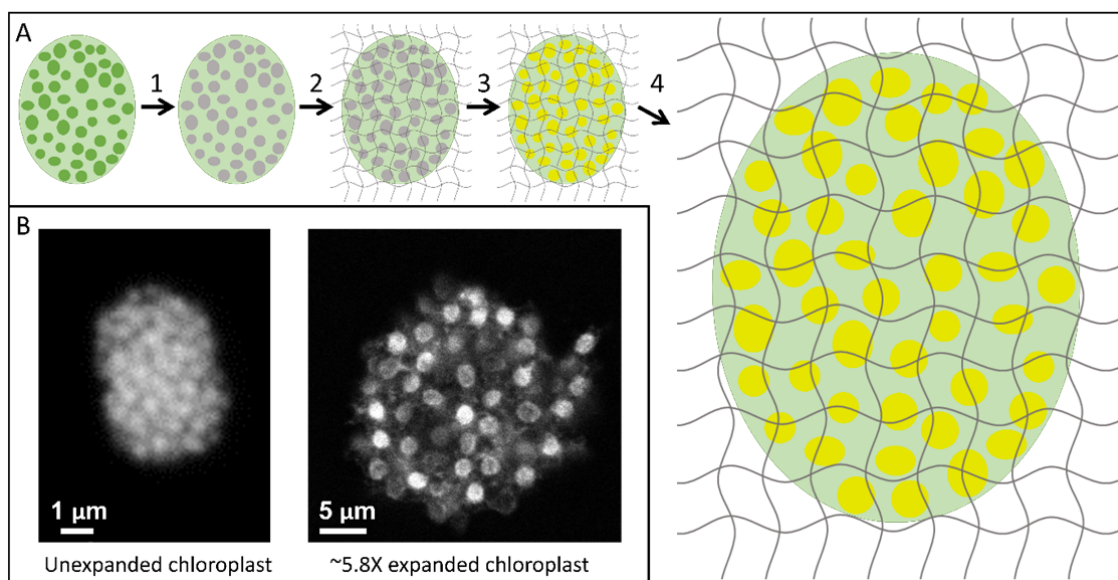

Figure 1 ExM on chloroplast. A) Workflow of ExM on chloroplasts. Isolated chloroplasts were fixed, permeabilised and anchored, upon which Chl fluorescence was lost (1). The chloroplasts were put in gel solution (2), stained with an ATTO-488 NHS-ester staining to stain all proteins (3) and expanded in ultrapure water (4). B) Chlorophyll fluorescence of an isolated unexpanded chloroplast (left) and ATTO-488 fluorescence of a 5.8 times expanded chloroplast (right). Both images made with confocal microscopy. Scalebars represent distance without correction for expansion.

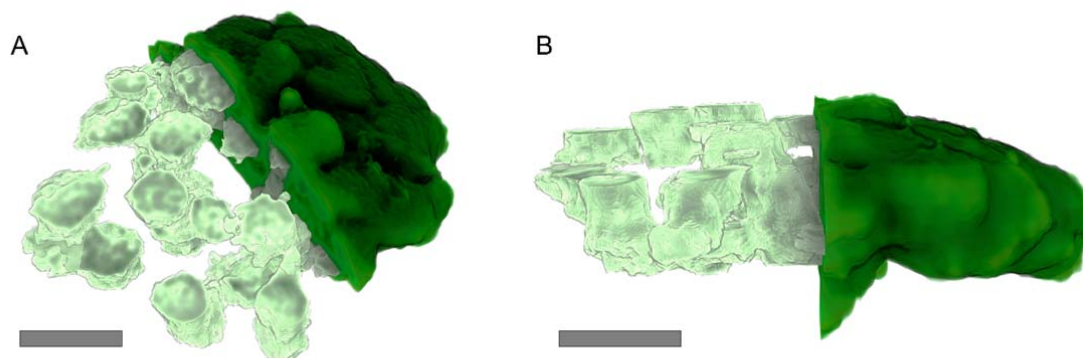

Figure 2 3D reconstruction of a chloroplast (dark green) and its grana (pale green). Grana stacks were segmented by hand from the surroundings. Only half of the complete signal (dark green) and half of the grana is shown. Scalebars represent 1  $\mu\text{m}$ , corrected to indicate pre-expansion dimensions. Images for this reconstruction were made with confocal microscopy.

208 were fixed and permeabilized to maintain the thylakoid structure and make the chloroplasts less  
209 resistant to expansion. Most of the chlorophyll was washed away during the permeabilization step.  
210 Proteins in the sample were linked to acrylamide anchors, which covalently link to the sodium  
211 acrylate-acrylamide gel in the gelation step (figure 1A) (Lai et al., 2016; Gambarotto et al., 2019). The  
212 primary amines of lysines and N-termini were labelled with an ATTO-488-NHS-ester staining, after  
213 which the samples were expanded 4.8 to 6.7 times and imaged. We found that the chloroplasts  
214 expanded with the gel up to a gel expansion factor of 6. However, chloroplasts expanded less than  
215 the gel when the gel expansion was higher (up to 10 times, SI figure 1 and 2). We observed a clear  
216 increase in resolution and could easily identify individual grana in the expanded chloroplasts (figure  
217 1B). A great advantage of ExM over EM- and AFM-based methods is that a z-stack of an entire  
218 chloroplast can be recorded to resolve the complete thylakoid structure of single chloroplasts in 3D  
219 (figure 2 and SI movie 4).

220 Typically, chloroplasts in the gel were positioned on their flat side and thus were imaged from  
221 the top (figure 3A and B and SI movie 1). This orientation enabled us to accurately determine the  
222 shape and diameter of the grana. Grana are well described as ovals and therefore, we could use  
223 Stardist, a neural network tool specifically designed to detect round shapes in biological samples, to  
224 determine the diameter of the grana (figure 3C-E). We found that there were differences in the size  
225 of the grana, even within a single chloroplast (figure 3C and D). The average diameter of the grana  
226 was  $325 \pm 56$  nm, but we detected a distribution of grana diameters ranging from 200 to 500 nm

227 (figure 3E, table 2). Additionally, we determined the number of grana per chloroplast to be  $91 \pm 32$   
228 (table 2).

229 In certain instances, we observed chloroplasts lying on their side, providing a side-view (figure  
230 4A and B and SI figure movies 2-3). Using ExM, we imaged chloroplasts that look similar to what is  
231 commonly seen with EM, including stroma lamellae appearing on both sides of grana stacks (figure  
232 4C-E). In all occasions, a right-handed wrapping of stroma lamellae around grana stacks was

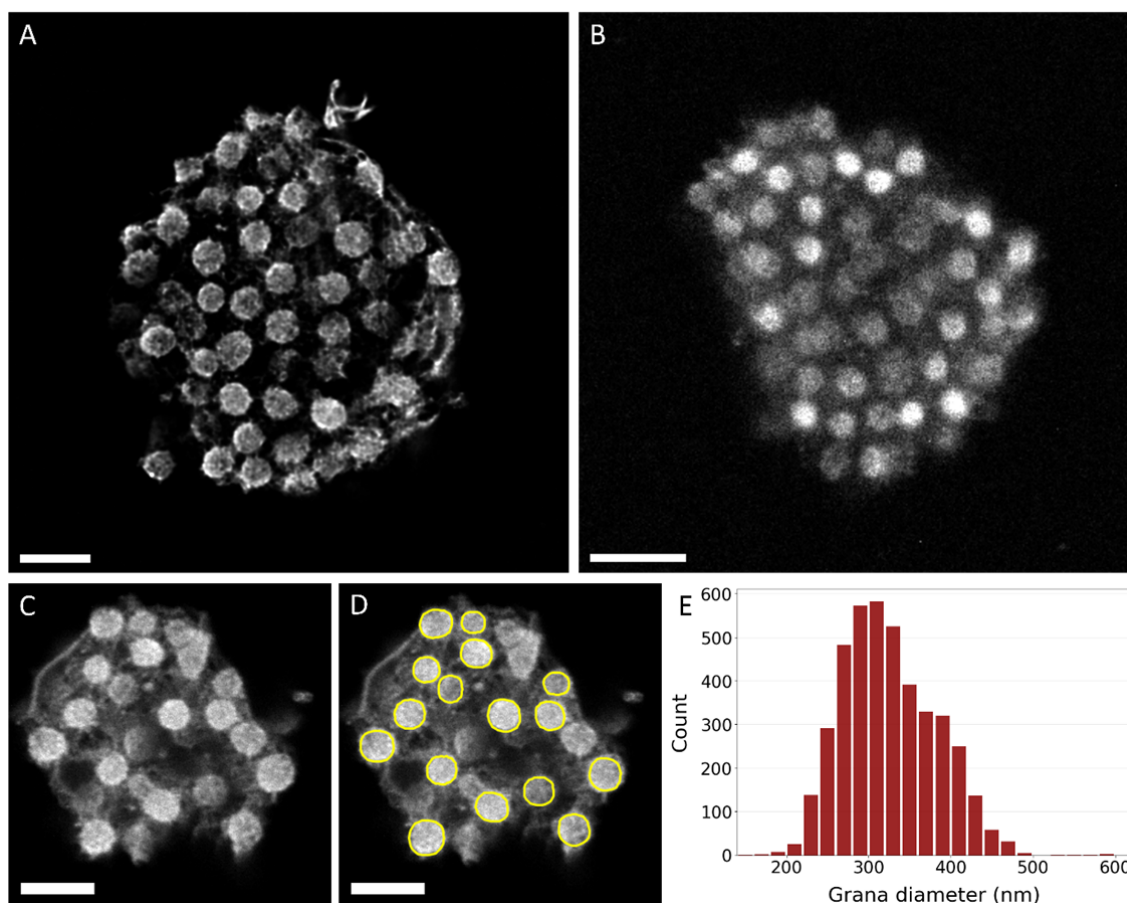

Figure 3 Top-views of expanded chloroplasts. Examples of chloroplasts in top-view as commonly found in the gel, imaged with lattice SIM<sup>2</sup> (A) or confocal microscopy (B, C). D) Annotation of the grana of the chloroplast from C as performed by Stardist. Scalebars represent 1  $\mu$ m, corrected to indicate pre-expansion dimensions. E) Histogram of the grana diameter.

233 observed (figure 4 and SI figure 3). This is the first observation of the helical wrapping of stroma  
234 lamellae using fluorescence microscopy and demonstrates the increased resolution achieved with  
235 ExM as compared to fluorescence microscopy. We resolved stroma lamellae that were less than 60  
236 nm apart in pre-expanded dimensions (figure 5). Next, we determined that the height of the grana  
237 stacks was  $355 \pm 164$  nm (figure 4F and G). We observed a distribution in stack height, ranging from  
238 stacks consisting of only a few membrane layers to grana spanning almost the entire chloroplast.  
239

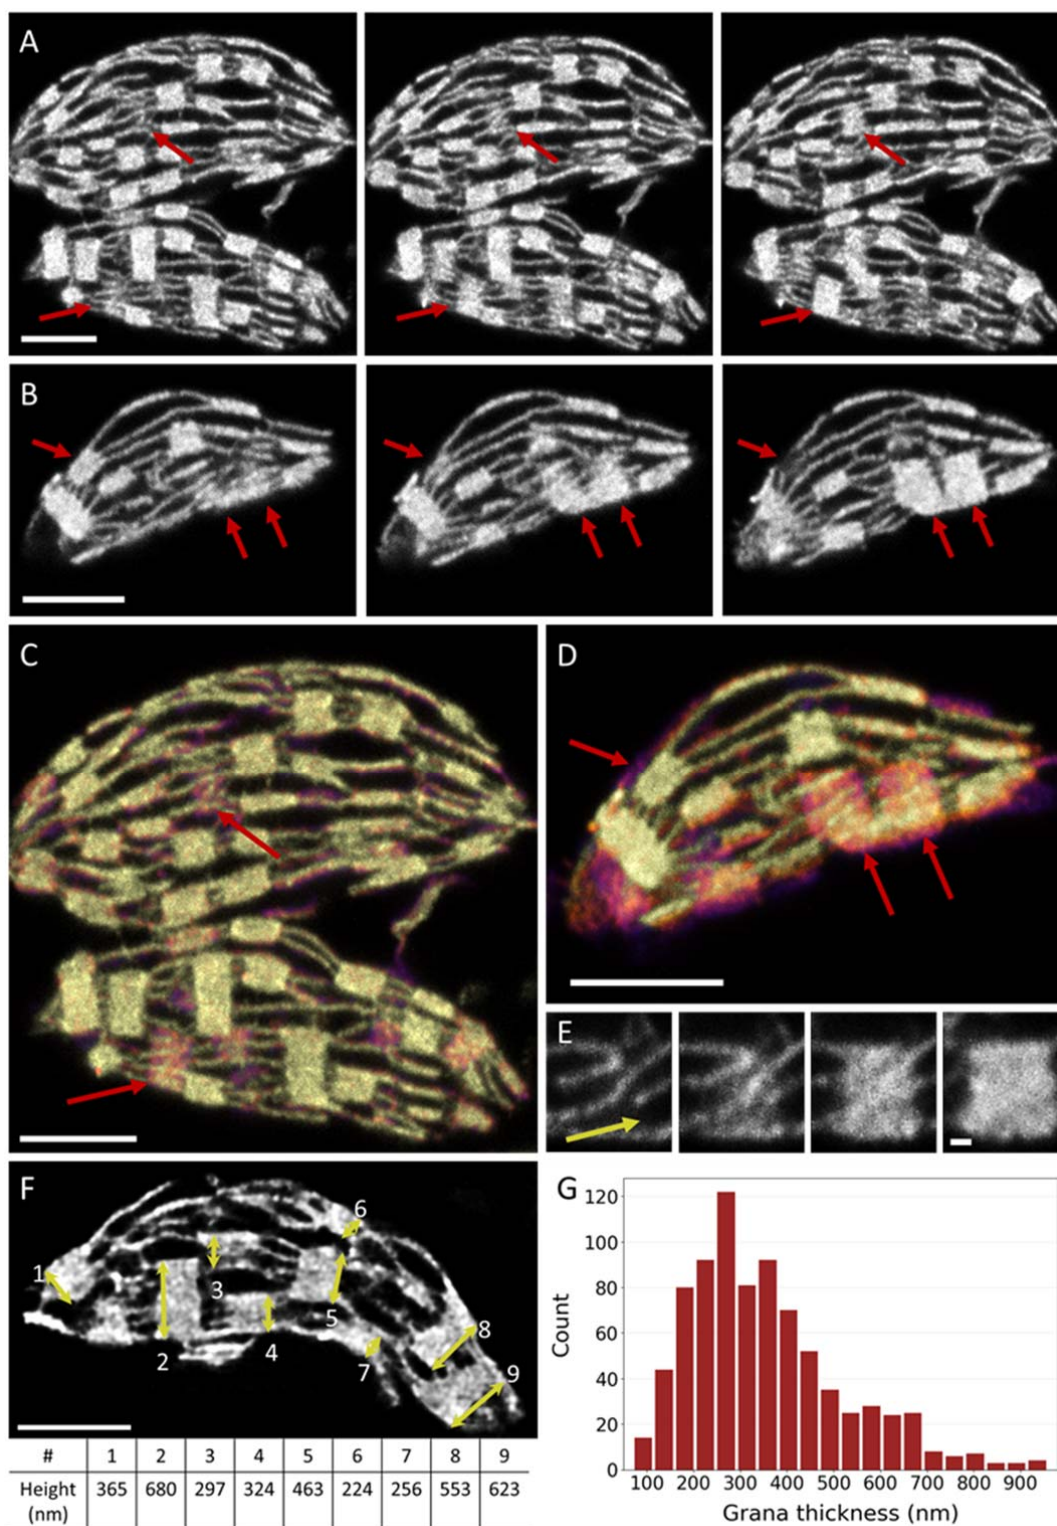

Figure 4 Side-view of expanded chloroplasts. A,B) Montages of side-views of chloroplasts. Red arrows indicate grana where the helical wrapping of the stroma can be observed. Images are 63 nm apart in Z (pre-expansion dimensions). C, D) Depth coded image of the montage in A and B. Red arrows indicate the grana that are also indicated in A and B. E) Example of helical wrapping of the stroma lamellae in a right-handed helix. The yellow arrow shows the wrapping direction of stroma lamellae. F) Example of measurements of grana height. The height of 9 grana stacks was measured and shown in the table. G) Histogram of the grana height. Images were made with confocal microscopy (A-E) or lattice SIM<sup>2</sup>. (F). Scalebar represents 1  $\mu$ m in A-D and F and 100 nm in E, corrected to indicate pre-expansion dimensions.

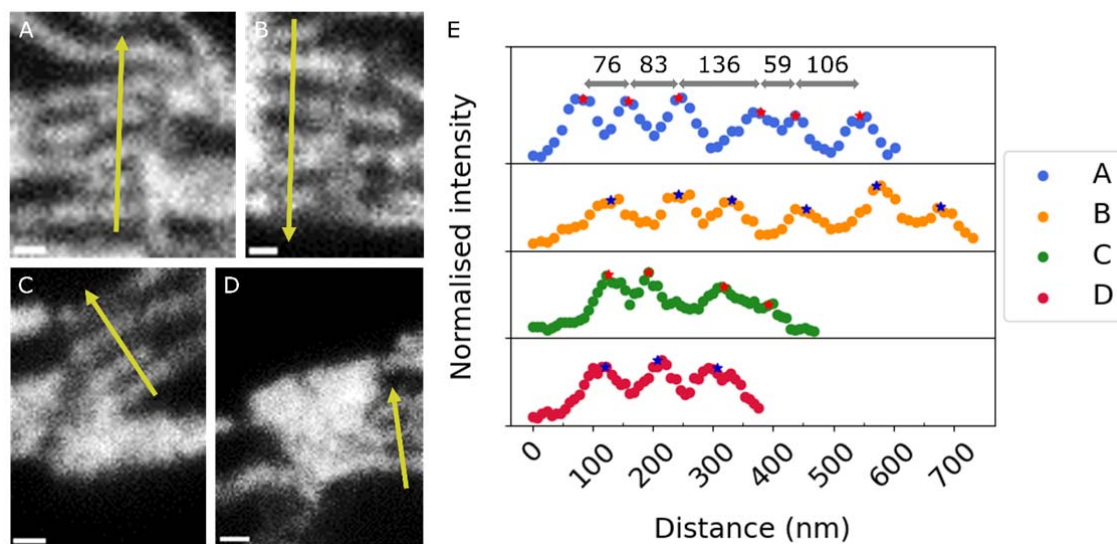

Figure 5 A-D) Examples of stroma lamellae in close proximity to each other, but distinguishable. E) Profile of intensity along the yellow lines in A-D. Peak centers were defined as the middle of the FWHM and are shown with an asterisk. For one profile, the distance between the peak centers is given in nm in pre-expanded dimensions. The minimal distance between the peaks was  $59 \pm 10$  nm in pre-expanded dimensions. Scalebars represent 100 nm in pre-expanded dimensions.

241

242

## 243 Discussion

244 Expansion microscopy - In this work, we used a combination of U-ExM and pan-ExM to image  
245 chloroplasts with a more than 5 times improved resolution compared to confocal microscopy. The  
246 analysis of top-view and side-view images of chloroplasts resulted in measurements of the grana  
247 dimensions with a large sample size (800-4000 measurements) and a high resolution (~60 nm).  
248 Moreover, we presented a 3D model of a complete chloroplast in which grana and stroma lamellae  
249 are accurately segmented.

250 Imaging chloroplasts with ExM offers several advantages over imaging with EM. Firstly, ExM is  
251 fast, since it requires only two days of sample preparation and results in a gel full of chloroplasts that  
252 can be imaged. Per chloroplast, it takes 1-10 minutes to record its complete structure, thereby  
253 outcompeting the speed of EM imaging (Wassie et al., 2019). Moreover, with ExM the volumes that  
254 can be imaged are larger. Additionally, the top-view images as obtained with ExM allow for a more  
255 direct measurement of the grana width than the cross-section views of EM. Together, that enables  
256 us to create large and accurate datasets on the dimensions of the chloroplast and the grana. The  
257 resolution reached in this study with ExM is lower than that of EM, but still high enough to accurately  
258 determine the diameter of the grana.

259 A possible drawback of ExM is that isolation, chemical fixation and expansion of chloroplasts  
260 might introduce deviations in the thylakoid structure as compared to its native organization.  
261 However, on visual inspection, our ExM images look similar to images from EM studies. In particular,  
262 the circular shape of grana observed in our top-view images suggests isotropic expansion of the  
263 grana. Moreover, the grana diameter we determined with ExM was comparable to literature values  
264 for the grana diameter of spinach ( $325 \pm 56$  nm vs 325-380 nm for literature, table 2 and 3).  
265 However, the height of the grana we determined using ExM differed from literature values ( $355 \pm$   
266  $164$  nm in our measurements vs 91-159 nm for literature, table 2 and 3). This discrepancy can have  
267 several causes: 1) The grana height is strongly dependent on the grow light intensity and spectral  
268 composition (Anderson et al., 1973; Wagner et al., 2008; Hu et al., 2021). 2) Due to the lower  
269 resolution of ExM compared to EM, two grana stacks may have appeared as one in our images and  
270 measured accordingly. Furthermore, small grana stacks might not be distinguished from stroma  
271 lamellae. 3) The thylakoid membrane could have swollen due to an increased stromal distance and  
272 swelling of the lumen, leading to an increased grana height. The thylakoid architecture is dynamic,  
273 e.g. light induced swelling of the thylakoid membrane has been reported (Li et al., 2020). Swelling  
274 might also occur during isolation and fixation of the de-enveloped chloroplast. In future research  
275 projects we aim to develop methods to image the thylakoid organization in intact chloroplast and  
276 protoplast. Furthermore, we aim to implement cryo-fixation (Laporte et al., 2022) to assure that the

277 native thylakoid architecture is visualized. Although thylakoid swelling might be a factor, the overall  
278 thylakoid macro-organization (number of grana, connection between grana and stroma lamellae,  
279 grana diameter) is consistent with EM data, showing that ExM is a suitable technique to study the  
280 thylakoid structure and build a 3D model.

281 Grana dimensions - The grana diameter as determined from the images of expanded  
282 chloroplasts ( $325 \pm 56$  nm) is comparable to other studies on *S. oleracea* (325-380 nm, table 3). The  
283 standard deviation of the grana diameter was 17% of the mean, and a similar distribution is  
284 recognized in other studies. In this study, grana ranging from 200-500 nm have been observed. Some  
285 outliers might have arisen from inaccuracies of the detection mechanism of the grana by the neural  
286 network Stardist, but many of the detected grana have been confirmed by visual inspection.  
287 Moreover, we only selected images with a clear grana structure for training and detection of the  
288 grana. It has been shown that especially for plants grown in natural light, the distribution in grana  
289 diameter is largest (Schumann et al., 2017). In agreement with this, we demonstrated that the grana  
290 diameter is far from a fixed value, even in a single chloroplast.

291 Next to the variation in the grana diameter within a single chloroplast, variation is noticed in the  
292 grana diameter reported in literature for 3 different species: *S. oleracea*, *A. thaliana* and *Lactuca*  
293 *sativa* (table 3). This contrasts studies that have suggested the grana diameter to be conserved  
294 between plant species (Albertsson and Andreasson, 2004; Bussi et al., 2019). Many studies have  
295 investigated the thylakoid organization of *A. thaliana* and all of these studies report a larger grana  
296 diameter than we find for *S. oleracea* (table 3). In addition, the grana diameter reported for *Lactuca*  
297 *sativa* is significantly smaller than ours (unpaired t-test,  $p < 0.0001$ ) (Bussi et al., 2019). A smaller  
298 grana diameter is suggested to increase the rate of state transitions, photosystem II (PSII) repair cycle  
299 and photosynthetic electron transfer (Wood et al., 2018; Wood et al., 2019; Höhner et al., 2020).  
300 Potentially, plants that are more resistant to higher light intensities can benefit from having smaller  
301 grana. It should be noted, however, that the light conditions, growth conditions and measuring  
302 technique were not the same in the compared literature. All three factors could have influenced the  
303 measured grana diameter (Schumann et al., 2017). In fact, Schumann et al. showed that by growing  
304 *A. thaliana* in different light intensities, the grana diameter can range from 390 nm (high light) to 570  
305 nm (low light) (Schumann et al., 2017). This range is almost as large as the range of different grana  
306 diameters reported in other studies. Therefore, to accurately determine if the grana diameter of  
307 plants is significantly different, a single study should compare the grana diameter of different plants  
308 species grown in the same light conditions. The same technique to image and detect the grana  
309 should be used for all samples. ExM is a suitable technique to investigate this kind of differences in  
310 thylakoid build-up between species.



311 Improvements - Although ExM is a fast and accurate imaging technique, we believe that ExM on  
312 chloroplasts can be improved to become more reliable and versatile. Most importantly, fixation of  
313 the chloroplasts was not successful in all attempts, which led to expanded chloroplasts without clear  
314 grana structure. We often observed expanded chloroplasts without grana structure when we used  
315 plants grown in a phytotron. The protocol that was used in this study was optimized for spinach  
316 purchased from the local grocer. Potentially, the isolation and fixation of chloroplasts from outdoor  
317 grown plants was more successful, because the thylakoid organization of plants grown in natural  
318 sunlight is different to those grown in artificial light (Schumann et al., 2017). Furthermore, the  
319 variable conditions outdoor could make these plants sturdier and more suitable for the preparation  
320 for ExM. The protocol for fixation should be optimized to make it better applicable on other plant  
321 species and plants grown in a phytotron. Furthermore, a method should be developed that assures  
322 that the fully native thylakoid architecture is visualized. Taken together this will allow to study light  
323 adaptation responses of the thylakoid membrane and to use mutant variants of the model plant *A.*  
324 *thaliana*.

325 Future perspective – The application of ExM in the field of photosynthesis offers a promising  
326 avenue to address several outstanding questions. ExM can facilitate the intuitive visualization of the  
327 folding of thylakoid membranes through the construction of a 3D model of the entire chloroplast. In  
328 addition, the dimensions of grana can be readily determined from a large dataset obtained with ExM,  
329 thereby aiding in the investigation of differences in thylakoid structure. Specifically, ExM can be  
330 employed to study the thylakoid architecture of different species or adaptations to varying light  
331 conditions. Next, ExM can be combined with antibody staining and hence enable accurate and fast  
332 protein localization (Gambarotto et al., 2019). Typically, antibody staining is challenging in  
333 chloroplasts due to limited antibody diffusion into the appressed regions and high background  
334 fluorescence from chlorophyll. With ExM, the sample is de-crowded and chlorophylls are washed  
335 away, which lowers the background and creates space in the appressed regions for primary and  
336 secondary antibodies. This technique could allow the staining and localization of key photosynthetic  
337 proteins, such as PSII and light harvesting complex II (LHCII), and facilitate the tracking of their  
338 location during different stages of state transitions or after high light damage. Furthermore, ExM  
339 could potentially enable the use of single molecule or super resolution imaging techniques on the  
340 thylakoid membrane by reducing background fluorescence from chlorophyll (Gambarotto et al.,  
341 2019). Combining high-resolution data on the thylakoid structure with the location of key  
342 photosynthetic proteins could provide valuable insights into the link between protein composition  
343 and thylakoid ultrastructure.

344

345 Table 1 Composition of four gels used in this study. All percentages are w/v%. For expansion factor, see SI  
 346 figure 2

|       | Sodium acrylate | Acrylamide | N,N'-methylenebisacrylamide |
|-------|-----------------|------------|-----------------------------|
| Gel A | 20.9%           | 10.0%      | 0.10%                       |
| Gel B | 30.1%           | 10.8%      | 0.04%                       |
| Gel C | 25.4%           | 5.6%       | 0.01%                       |
| Gel D | 34.3%           | 5.3%       | 0.01%                       |

347

348

349

350

Table 2 Dimensions of chloroplasts and grana as determined in this study.

| Trait                               | Mean         | Standard deviation | Sample size (n)    |
|-------------------------------------|--------------|--------------------|--------------------|
| <b>Chloroplast diameter (unexp)</b> | 3.65 $\mu$ m | 1.19 $\mu$ m       | 239 <sup>353</sup> |
| <b>Grana diameter</b>               | 325 nm       | 56 nm              | 415 <sup>354</sup> |
| <b>Grana height</b>                 | 355 nm       | 164 nm             | 815 <sup>355</sup> |
| <b>Grana per chloroplast</b>        | 91           | 32                 | 20                 |

356 Table 3 Dimensions of grana determined with different techniques and on different plant species (Fristedt  
 357 et al., 2009; Wood et al., 2018; Bussi et al., 2019; Mazur et al., 2019; Wood et al., 2019; Flannery et al., 2021;  
 358 Sattari Vayghan et al., 2022). The mean value  $\pm$  standard deviation is given. Where applicable, the values are  
 359 given for light adapted plants and plants grown in normal light conditions.

| Article                      | Species               | Technique | Grana diameter (nm) | Grana height (nm) | Grana per chloroplast |
|------------------------------|-----------------------|-----------|---------------------|-------------------|-----------------------|
| Fristedt et al., 2009        | <i>A. thaliana</i>    | EM        | 439 $\pm$ 155       | 74 $\pm$ 36       | -                     |
| Wood et al., 2019            | <i>A. thaliana</i>    | SIM       | 350 $\pm$ 70        | -                 | -                     |
| Mazur et al., 2019           | <i>A. thaliana</i>    | EM        | 600 $\pm$ 157       | 156 $\pm$ 81      | -                     |
| Flannery et al., 2021        | <i>A. thaliana</i>    | SIM       | 386 $\pm$ 61        | -                 | -                     |
| Flannery et al., 2021        | <i>A. thaliana</i>    | EM        | -                   | 114 $\pm$ 69      | -                     |
| Sattari Vayghan et al., 2022 | <i>A. thaliana</i>    | EM        | 501 $\pm$ 143       | 91 $\pm$ 39       | -                     |
| Bussi et al., 2019           | <i>Lactuca sativa</i> | EM        | 278 $\pm$ 43        | 159 $\pm$ 94      | -                     |
| Wood et al., 2018            | <i>S. oleracea</i>    | EM        | 325 $\pm$ 74        | 106 $\pm$ 64      | -                     |
| Wood et al., 2018            | <i>S. oleracea</i>    | SIM       | 343 $\pm$ 58        | -                 | 66 $\pm$ 9            |
| Wood et al., 2019            | <i>S. oleracea</i>    | SIM       | 380 $\pm$ 60        | -                 | -                     |

360

## 361 Acknowledgements

362 This work was supported by the Dutch Organisation for Scientific Research (NWO) via a Vidi  
363 grant no. VI.Vidi 192.042 (E.W.). The authors would like to thank Francesco Saccon for critically  
364 reading the manuscript. Additionally, we would like to express our appreciation to Dr. Edwin Lamers  
365 (Carl Zeiss bv) and Dr. Abel Pereira da Graça (Carl Zeiss Microscopy GmbH) for the opportunity to use  
366 the ZEISS Elyra 7 with Lattice SIM<sup>2</sup> and their technical assistance.

367

368

369

## References

- 370 **Albertsson PÅ, Andreasson E** (2004) The constant proportion of grana and stroma lamellae in plant  
371 chloroplasts. *Physiologia Plantarum* **121**: 334-342
- 372 **Anderson JM, Goodchild D, Boardman N** (1973) Composition of the photosystems and chloroplast  
373 structure in extreme shade plants. *Biochimica et Biophysica Acta (BBA)-Bioenergetics* **325**:  
374 573-585
- 375 **Anderson JM, Horton P, Kim E-H, Chow WS** (2012) Towards elucidation of dynamic structural  
376 changes of plant thylakoid architecture. *Philosophical Transactions of the Royal Society B:*  
377 *Biological Sciences* **367**: 3515-3524
- 378 **Armbruster U, Labs M, Pribil M, Viola S, Xu W, Scharfenberg M, Hertle AP, Rojahn U, Jensen PE,**  
379 **Rappaport F** (2013) Arabidopsis CURVATURE THYLAKOID1 proteins modify thylakoid  
380 architecture by inducing membrane curvature. *The Plant Cell* **25**: 2661-2678
- 381 **Blankenship RE** (2021) Molecular mechanisms of photosynthesis. John Wiley & Sons
- 382 **Bussi Y, Shimoni E, Weiner A, Kapon R, Charuvi D, Nevo R, Efrati E, Reich Z** (2019) Fundamental  
383 helical geometry consolidates the plant photosynthetic membrane. *Proceedings of the*  
384 *National Academy of Sciences* **116**: 22366-22375
- 385 **Caffarri S, Kouřil R, Kerešiče S, Boekema EJ, Croce R** (2009) Functional architecture of higher plant  
386 photosystem II supercomplexes. *The EMBO journal* **28**: 3052-3063
- 387 **Chen F, Tillberg PW, Boyden ES** (2015) Expansion microscopy. *Science* **347**: 543-548
- 388 **Damstra HG, Mohar B, Eddison M, Akhmanova A, Kapitein LC, Tillberg PW** (2022) Visualizing cellular  
389 and tissue ultrastructure using Ten-fold Robust Expansion Microscopy (TReX). *Elife* **11**:  
390 e73775
- 391 **Engel BD, Schaffer M, Kuhn Cuellar L, Villa E, Plitzko JM, Baumeister W** (2015) Native architecture of  
392 the Chlamydomonas chloroplast revealed by in situ cryo-electron tomography. *elife* **4**:  
393 e04889
- 394 **Flannery SE, Hepworth C, Wood WH, Pastorelli F, Hunter CN, Dickman MJ, Jackson PJ, Johnson MP**  
395 (2021) Developmental acclimation of the thylakoid proteome to light intensity in Arabidopsis.  
396 *The Plant Journal* **105**: 223-244
- 397 **Fristedt R, Willig A, Granath P, Crevecoeur M, Rochaix J-D, Vener AV** (2009) Phosphorylation of  
398 photosystem II controls functional macroscopic folding of photosynthetic membranes in  
399 Arabidopsis. *The Plant Cell* **21**: 3950-3964
- 400 **Gambarotto D, Zwettler FU, Le Guennec M, Schmidt-Cernohorska M, Fortun D, Borgers S, Heine J,**  
401 **Schloetel J-G, Reuss M, Unser M** (2019) Imaging cellular ultrastructures using expansion  
402 microscopy (U-ExM). *Nature methods* **16**: 71-74
- 403 **Gómez-de-Mariscal E, García-López-de-Haro C, Ouyang W, Donati L, Lundberg E, Unser M, Muñoz-**  
404 **Barrutia A, Sage D** (2021) DeepImageJ: A user-friendly environment to run deep learning  
405 models in ImageJ. *Nature Methods* **18**: 1192-1195
- 406 **Höhner R, Pribil M, Herbstová M, Lopez LS, Kunz H-H, Li M, Wood M, Svoboda V, Puthiyaveetil S,**  
407 **Leister D** (2020) Plastocyanin is the long-range electron carrier between photosystem II and  
408 photosystem I in plants. *Proceedings of the National Academy of Sciences* **117**: 15354-15362
- 409 **Hu C, Nawrocki WJ, Croce R** (2021) Long-term adaptation of Arabidopsis thaliana to far-red light.  
410 *Plant, cell & environment* **44**: 3002-3014
- 411 **Hu Y, Limaye A, Lu J** (2020) Three-dimensional segmentation of computed tomography data using  
412 Drishti Paint: new tools and developments. *Royal Society Open Science* **7**: 201033
- 413 **Iwai M, Roth MS, Niyogi KK** (2018) Subdiffraction-resolution live-cell imaging for visualizing thylakoid  
414 membranes. *The Plant Journal* **96**: 233-243
- 415 **Johnson MP, Vasilev C, Olsen JD, Hunter CN** (2014) Nanodomains of cytochrome b 6 f and  
416 photosystem II complexes in spinach grana thylakoid membranes. *The Plant Cell* **26**: 3051-  
417 3061
- 418 **Johnson MP, Wientjes E** (2020) The relevance of dynamic thylakoid organisation to photosynthetic  
419 regulation. *Biochimica et Biophysica Acta (BBA)-Bioenergetics* **1861**: 148039

- 420 **Kaftan D, Brumfeld V, Nevo R, Scherz A, Reich Z** (2002) From chloroplasts to photosystems: in situ  
421 scanning force microscopy on intact thylakoid membranes. *The EMBO journal* **21**: 6146-6153
- 422 **Kirchhoff H** (2014) Diffusion of molecules and macromolecules in thylakoid membranes. *Biochimica*  
423 *et Biophysica Acta (BBA)-Bioenergetics* **1837**: 495-502
- 424 **Lai HM, Liu AKL, Ng W-L, DeFelice J, Lee WS, Li H, Li W, Ng HM, Chang RC-C, Lin B** (2016)  
425 Rationalisation and validation of an acrylamide-free procedure in three-dimensional  
426 histological imaging. *PLoS One* **11**: e0158628
- 427 **Laporte MH, Klana N, Hamel V, Guichard P** (2022) Visualizing the native cellular organization by  
428 coupling cryofixation with expansion microscopy (Cryo-ExM). *Nature methods* **19**: 216-222
- 429 **Li M, Mukhopadhyay R, Svoboda V, Oung HMO, Mullendore DL, Kirchhoff H** (2020) Measuring the  
430 dynamic response of the thylakoid architecture in plant leaves by electron microscopy. *Plant*  
431 *Direct* **4**: e00280
- 432 **Limaye A** (2012) Drishti: a volume exploration and presentation tool. *In* *Developments in X-ray*  
433 *Tomography VIII*, Vol 8506. SPIE, pp 191-199
- 434 **Liu L-N, Scheuring S** (2013) Investigation of photosynthetic membrane structure using atomic force  
435 microscopy. *Trends in plant science* **18**: 277-286
- 436 **M'Saad O, Bewersdorf J** (2020) Light microscopy of proteins in their ultrastructural context. *Nature*  
437 *communications* **11**: 1-15
- 438 **Mazur R, Mostowska A, Szach J, Gieczewska K, Wójtowicz J, Bednarska K, Garstka M, Kowalewska Ł**  
439 (2019) Galactolipid deficiency disturbs spatial arrangement of the thylakoid network in  
440 *Arabidopsis thaliana* plants. *Journal of Experimental Botany*
- 441 **Mehta M, Sarafis V, Critchley C** (1999) Thylakoid membrane architecture. *Functional Plant Biology*  
442 **26**: 709-716
- 443 **Mustardy L, Buttler K, Steinbach G, Garab Gz** (2008) The three-dimensional network of the thylakoid  
444 membranes in plants: quasihelical model of the granum-stroma assembly. *The Plant Cell* **20**:  
445 2552-2557
- 446 **Mustárdy L, Garab G** (2003) Granum revisited. A three-dimensional model—where things fall into  
447 place. *Trends in plant science* **8**: 117-122
- 448 **Onoa B, Fukuda S, Iwai M, Bustamante C, Niyogi KK** (2020) Atomic force microscopy visualizes  
449 mobility of photosynthetic proteins in grana thylakoid membranes. *Biophysical journal* **118**:  
450 1876-1886
- 451 **Paolillo Jr DJ** (1970) The three-dimensional arrangement of intergranal lamellae in chloroplasts.  
452 *Journal of Cell Science* **6**: 243-253
- 453 **Pribil M, Labs M, Leister D** (2014) Structure and dynamics of thylakoids in land plants. *Journal of*  
454 *experimental botany* **65**: 1955-1972
- 455 **Sattari Vayghan H, Nawrocki WJ, Schiphorst C, Tolleter D, Hu C, Douet V, Glauser G, Finazzi G,**  
456 **Croce R, Wientjes E** (2022) Photosynthetic light harvesting and thylakoid organization in a  
457 CRISPR/Cas9 *Arabidopsis thaliana* LHCB1 knockout mutant. *Frontiers in plant science* **13**:  
458 833032
- 459 **Schmidt U, Weigert M, Broaddus C, Myers G** (2018) Cell detection with star-convex polygons. *In*  
460 *International Conference on Medical Image Computing and Computer-Assisted Intervention*.  
461 Springer, pp 265-273
- 462 **Schumann T, Paul S, Melzer M, Dörmann P, Jahns P** (2017) Plant growth under natural light  
463 conditions provides highly flexible short-term acclimation properties toward high light stress.  
464 *Frontiers in plant science* **8**: 681
- 465 **Shimoni E, Rav-Hon O, Ohad I, Brumfeld V, Reich Z** (2005) Three-dimensional organization of higher-  
466 plant chloroplast thylakoid membranes revealed by electron tomography. *The Plant Cell* **17**:  
467 2580-2586
- 468 **Wagner R, Dietzel L, Bräutigam K, Fischer W, Pfannschmidt T** (2008) The long-term response to  
469 fluctuating light quality is an important and distinct light acclimation mechanism that  
470 supports survival of *Arabidopsis thaliana* under low light conditions. *Planta* **228**: 573-587

- 471 **Wassie AT, Zhao Y, Boyden ES** (2019) Expansion microscopy: principles and uses in biological  
472 research. *Nature methods* **16**: 33-41
- 473 **Weigert M, Schmidt U, Haase R, Sugawara K, Myers G** (2020) Star-convex polyhedra for 3D object  
474 detection and segmentation in microscopy. *In Proceedings of the IEEE/CVF Winter*  
475 *Conference on Applications of Computer Vision*, pp 3666-3673
- 476 **Wietrzynski W, Schaffer M, Tegunov D, Albert S, Kanazawa A, Pnitzko JM, Baumeister W, Engel BD**  
477 (2020) Charting the native architecture of Chlamydomonas thylakoid membranes with single-  
478 molecule precision. *Elife* **9**: e53740
- 479 **Wildman S, Hirsch AM, Kirchanski S, Spencer D** (2005) Chloroplasts in living cells and the string-of-  
480 grana concept of chloroplast structure revisited. *Discoveries in Photosynthesis*: 737-744
- 481 **Wood WH, Barnett SF, Flannery S, Hunter CN, Johnson MP** (2019) Dynamic thylakoid stacking is  
482 regulated by LHClI phosphorylation but not its interaction with PSI. *Plant physiology* **180**:  
483 2152-2166
- 484 **Wood WH, MacGregor-Chatwin C, Barnett SF, Mayneord GE, Huang X, Hobbs JK, Hunter CN,**  
485 **Johnson MP** (2018) Dynamic thylakoid stacking regulates the balance between linear and  
486 cyclic photosynthetic electron transfer. *Nature plants* **4**: 116-127
- 487 **Zhang C, Kang JS, Asano SM, Gao R, Boyden ES** (2020) Expansion microscopy for beginners:  
488 visualizing microtubules in expanded cultured HeLa cells. *Current protocols in neuroscience*  
489 **92**: e96
- 490

## Parsed Citations

- Albertsson PÅ, Andreasson E (2004)** The constant proportion of grana and stroma lamellae in plant chloroplasts. *Physiologia Plantarum* 121: 334-342  
Google Scholar: [Author Only](#) [Title Only](#) [Author and Title](#)
- Anderson JM, Goodchild D, Boardman N (1973)** Composition of the photosystems and chloroplast structure in extreme shade plants. *Biochimica et Biophysica Acta (BBA)-Bioenergetics* 325: 573-585  
Google Scholar: [Author Only](#) [Title Only](#) [Author and Title](#)
- Anderson JM, Horton P, Kim E-H, Chow WS (2012)** Towards elucidation of dynamic structural changes of plant thylakoid architecture. *Philosophical Transactions of the Royal Society B: Biological Sciences* 367: 3515-3524  
Google Scholar: [Author Only](#) [Title Only](#) [Author and Title](#)
- Armbruster U, Labs M, Pribil M, Viola S, Xu W, Scharfenberg M, Hertle AP, Rojahn U, Jensen PE, Rappaport F (2013)** Arabidopsis CURVATURE THYLAKOID1 proteins modify thylakoid architecture by inducing membrane curvature. *The Plant Cell* 25: 2661-2678  
Google Scholar: [Author Only](#) [Title Only](#) [Author and Title](#)
- Blankenship RE (2021)** Molecular mechanisms of photosynthesis. John Wiley & Sons  
Google Scholar: [Author Only](#) [Title Only](#) [Author and Title](#)
- Bussi Y, Shimoni E, Weiner A, Kapon R, Charuvi D, Nevo R, Efrati E, Reich Z (2019)** Fundamental helical geometry consolidates the plant photosynthetic membrane. *Proceedings of the National Academy of Sciences* 116: 22366-22375  
Google Scholar: [Author Only](#) [Title Only](#) [Author and Title](#)
- Caffarri S, Kouřil R, Kereiche S, Boekema EJ, Croce R (2009)** Functional architecture of higher plant photosystem II supercomplexes. *The EMBO journal* 28: 3052-3063  
Google Scholar: [Author Only](#) [Title Only](#) [Author and Title](#)
- Chen F, Tillberg PW, Boyden ES (2015)** Expansion microscopy. *Science* 347: 543-548  
Google Scholar: [Author Only](#) [Title Only](#) [Author and Title](#)
- Damstra HG, Mohar B, Eddison M, Akhmanova A, Kapitein LC, Tillberg PW (2022)** Visualizing cellular and tissue ultrastructure using Ten-fold Robust Expansion Microscopy (TReX). *Elife* 11: e73775  
Google Scholar: [Author Only](#) [Title Only](#) [Author and Title](#)
- Engel BD, Schaffer M, Kuhn Cuellar L, Villa E, Plietzko JM, Baumeister W (2015)** Native architecture of the Chlamydomonas chloroplast revealed by in situ cryo-electron tomography. *elife* 4: e04889  
Google Scholar: [Author Only](#) [Title Only](#) [Author and Title](#)
- Flannery SE, Hepworth C, Wood WH, Pastorelli F, Hunter CN, Dickman MJ, Jackson PJ, Johnson MP (2021)** Developmental acclimation of the thylakoid proteome to light intensity in Arabidopsis. *The Plant Journal* 105: 223-244  
Google Scholar: [Author Only](#) [Title Only](#) [Author and Title](#)
- Fristedt R, Willig A, Granath P, Crevecoeur M, Rochaix J-D, Vener AV (2009)** Phosphorylation of photosystem II controls functional macroscopic folding of photosynthetic membranes in Arabidopsis. *The Plant Cell* 21: 3950-3964  
Google Scholar: [Author Only](#) [Title Only](#) [Author and Title](#)
- Gambarotto D, Zwieter FU, Le Guennec M, Schmidt-Cernohorska M, Fortun D, Borgers S, Heine J, Schloetel J-G, Reuss M, Unser M (2019)** Imaging cellular ultrastructures using expansion microscopy (U-ExM). *Nature methods* 16: 71-74  
Google Scholar: [Author Only](#) [Title Only](#) [Author and Title](#)
- Gómez-de-Mariscal E, García-López-de-Haro C, Ouyang W, Donati L, Lundberg E, Unser M, Muñoz-Barrutia A, Sage D (2021)** DeepImageJ: A user-friendly environment to run deep learning models in ImageJ. *Nature Methods* 18: 1192-1195  
Google Scholar: [Author Only](#) [Title Only](#) [Author and Title](#)
- Höhner R, Pribil M, Herbstová M, Lopez LS, Kunz H-H, Li M, Wood M, Svoboda V, Puthiyaveetil S, Leister D (2020)** Plastocyanin is the long-range electron carrier between photosystem II and photosystem I in plants. *Proceedings of the National Academy of Sciences* 117: 15354-15362  
Google Scholar: [Author Only](#) [Title Only](#) [Author and Title](#)
- Hu C, Nawrocki WJ, Croce R (2021)** Long-term adaptation of Arabidopsis thaliana to far-red light. *Plant, cell & environment* 44: 3002-3014  
Google Scholar: [Author Only](#) [Title Only](#) [Author and Title](#)
- Hu Y, Limaye A, Lu J (2020)** Three-dimensional segmentation of computed tomography data using Drishti Paint: new tools and developments. *Royal Society Open Science* 7: 201033  
Google Scholar: [Author Only](#) [Title Only](#) [Author and Title](#)
- Iwai M, Roth MS, Niyogi KK (2018)** Subdiffraction-resolution live-cell imaging for visualizing thylakoid membranes. *The Plant*



**Journal 96: 233-243**

Google Scholar: [Author Only](#) [Title Only](#) [Author and Title](#)

**Johnson MP, Vasilev C, Olsen JD, Hunter CN (2014) Nanodomains of cytochrome b 6 f and photosystem II complexes in spinach grana thylakoid membranes. The Plant Cell 26: 3051-3061**

Google Scholar: [Author Only](#) [Title Only](#) [Author and Title](#)

**Johnson MP, Wientjes E (2020) The relevance of dynamic thylakoid organisation to photosynthetic regulation. Biochimica et Biophysica Acta (BBA)-Bioenergetics 1861: 148039**

Google Scholar: [Author Only](#) [Title Only](#) [Author and Title](#)

**Kaftan D, Brumfeld V, Nevo R, Scherz A, Reich Z (2002) From chloroplasts to photosystems: in situ scanning force microscopy on intact thylakoid membranes. The EMBO journal 21: 6146-6153**

Google Scholar: [Author Only](#) [Title Only](#) [Author and Title](#)

**Kirchhoff H (2014) Diffusion of molecules and macromolecules in thylakoid membranes. Biochimica et Biophysica Acta (BBA)-Bioenergetics 1837: 495-502**

Google Scholar: [Author Only](#) [Title Only](#) [Author and Title](#)

**Lai HM, Liu AKL, Ng W-L, DeFelice J, Lee WS, Li H, Li W, Ng HM, Chang RC-C, Lin B (2016) Rationalisation and validation of an acrylamide-free procedure in three-dimensional histological imaging. PLoS One 11: e0158628**

Google Scholar: [Author Only](#) [Title Only](#) [Author and Title](#)

**Laporte MH, Klana N, Hamel V, Guichard P (2022) Visualizing the native cellular organization by coupling cryofixation with expansion microscopy (Cryo-ExM). Nature methods 19: 216-222**

Google Scholar: [Author Only](#) [Title Only](#) [Author and Title](#)

**Li M, Mukhopadhyay R, Svoboda V, Oung HMO, Mullendore DL, Kirchhoff H (2020) Measuring the dynamic response of the thylakoid architecture in plant leaves by electron microscopy. Plant Direct 4: e00280**

Google Scholar: [Author Only](#) [Title Only](#) [Author and Title](#)

**Limaye A (2012) Drishti: a volume exploration and presentation tool. In Developments in X-ray Tomography VIII, Vol 8506. SPIE, pp 191-199**

Google Scholar: [Author Only](#) [Title Only](#) [Author and Title](#)

**Liu L-N, Scheuring S (2013) Investigation of photosynthetic membrane structure using atomic force microscopy. Trends in plant science 18: 277-286**

Google Scholar: [Author Only](#) [Title Only](#) [Author and Title](#)

**M'Saad O, Bewersdorf J (2020) Light microscopy of proteins in their ultrastructural context. Nature communications 11: 1-15**

Google Scholar: [Author Only](#) [Title Only](#) [Author and Title](#)

**Mazur R, Mostowska A, Szach J, Gieczewska K, Wójtowicz J, Bednarska K, Garstka M, Kowalewska Ł (2019) Galactolipid deficiency disturbs spatial arrangement of the thylakoid network in Arabidopsis thaliana plants. Journal of Experimental Botany**

Google Scholar: [Author Only](#) [Title Only](#) [Author and Title](#)

**Mehta M, Sarafis V, Critchley C (1999) Thylakoid membrane architecture. Functional Plant Biology 26: 709-716**

Google Scholar: [Author Only](#) [Title Only](#) [Author and Title](#)

**Mustardy L, Buttle K, Steinbach G, Garab Gz (2008) The three-dimensional network of the thylakoid membranes in plants: quasi-helical model of the granum-stroma assembly. The Plant Cell 20: 2552-2557**

Google Scholar: [Author Only](#) [Title Only](#) [Author and Title](#)

**Mustardy L, Garab G (2003) Granum revisited. A three-dimensional model—where things fall into place. Trends in plant science 8: 117-122**

Google Scholar: [Author Only](#) [Title Only](#) [Author and Title](#)

**Onoa B, Fukuda S, Iwai M, Bustamante C, Niyogi KK (2020) Atomic force microscopy visualizes mobility of photosynthetic proteins in grana thylakoid membranes. Biophysical journal 118: 1876-1886**

Google Scholar: [Author Only](#) [Title Only](#) [Author and Title](#)

**Paolillo Jr DJ (1970) The three-dimensional arrangement of intergranal lamellae in chloroplasts. Journal of Cell Science 6: 243-253**

Google Scholar: [Author Only](#) [Title Only](#) [Author and Title](#)

**Pribil M, Labs M, Leister D (2014) Structure and dynamics of thylakoids in land plants. Journal of experimental botany 65: 1955-1972**

Google Scholar: [Author Only](#) [Title Only](#) [Author and Title](#)

**Sattari Vayghan H, Nawrocki WJ, Schiphorst C, Tolleter D, Hu C, Douet V, Glauser G, Finazzi G, Croce R, Wientjes E (2022) Photosynthetic light harvesting and thylakoid organization in a CRISPR/Cas9 Arabidopsis thaliana LHCB1 knockout mutant.**

**Frontiers in plant science 13: 833032**

Google Scholar: [Author Only](#) [Title Only](#) [Author and Title](#)

**Schmidt U, Weigert M, Broaddus C, Myers G (2018) Cell detection with star-convex polygons. In International Conference on Medical Image Computing and Computer-Assisted Intervention. Springer, pp 265-273**

Google Scholar: [Author Only](#) [Title Only](#) [Author and Title](#)

**Schumann T, Paul S, Melzer M, Dörmann P, Jahns P (2017) Plant growth under natural light conditions provides highly flexible short-term acclimation properties toward high light stress. Frontiers in plant science 8: 681**

Google Scholar: [Author Only](#) [Title Only](#) [Author and Title](#)

**Shimoni E, Rav-Hon O, Ohad I, Brumfeld V, Reich Z (2005) Three-dimensional organization of higher-plant chloroplast thylakoid membranes revealed by electron tomography. The Plant Cell 17: 2580-2586**

Google Scholar: [Author Only](#) [Title Only](#) [Author and Title](#)

**Wagner R, Dietzel L, Bräutigam K, Fischer W, Pfannschmidt T (2008) The long-term response to fluctuating light quality is an important and distinct light acclimation mechanism that supports survival of *Arabidopsis thaliana* under low light conditions. *Planta* 228: 573-587**

Google Scholar: [Author Only](#) [Title Only](#) [Author and Title](#)

**Wassie AT, Zhao Y, Boyden ES (2019) Expansion microscopy: principles and uses in biological research. *Nature methods* 16: 33-41**

Google Scholar: [Author Only](#) [Title Only](#) [Author and Title](#)

**Weigert M, Schmidt U, Haase R, Sugawara K, Myers G (2020) Star-convex polyhedra for 3D object detection and segmentation in microscopy. In Proceedings of the IEEE/CVF Winter Conference on Applications of Computer Vision, pp 3666-3673**

Google Scholar: [Author Only](#) [Title Only](#) [Author and Title](#)

**Wietrzynski W, Schaffer M, Tegunov D, Albert S, Kanazawa A, Plitzko JM, Baumeister W, Engel BD (2020) Charting the native architecture of *Chlamydomonas* thylakoid membranes with single-molecule precision. *Elife* 9: e53740**

Google Scholar: [Author Only](#) [Title Only](#) [Author and Title](#)

**Wildman S, Hirsch AM, Kirchanski S, Spencer D (2005) Chloroplasts in living cells and the string-of-grana concept of chloroplast structure revisited. *Discoveries in Photosynthesis*: 737-744**

Google Scholar: [Author Only](#) [Title Only](#) [Author and Title](#)

**Wood WH, Barnett SF, Flannery S, Hunter CN, Johnson MP (2019) Dynamic thylakoid stacking is regulated by LHCII phosphorylation but not its interaction with PSI. *Plant physiology* 180: 2152-2166**

Google Scholar: [Author Only](#) [Title Only](#) [Author and Title](#)

**Wood WH, MacGregor-Chatwin C, Barnett SF, Mayneord GE, Huang X, Hobbs JK, Hunter CN, Johnson MP (2018) Dynamic thylakoid stacking regulates the balance between linear and cyclic photosynthetic electron transfer. *Nature plants* 4: 116-127**

Google Scholar: [Author Only](#) [Title Only](#) [Author and Title](#)

**Zhang C, Kang JS, Asano SM, Gao R, Boyden ES (2020) Expansion microscopy for beginners: visualizing microtubules in expanded cultured HeLa cells. *Current protocols in neuroscience* 92: e96**

Google Scholar: [Author Only](#) [Title Only](#) [Author and Title](#)
